# Supplementary material for: Including planocerid flatworms in the diet effectively toxifies the pufferfish, Takifugu niphobles
Source: PubMed Central journal article supplement (PMC6098040; doi:10.1038/s41598-018-30696-z), 2018-08-17
Supplement: 41598_2018_30696_MOESM1_ESM.pdf [file 41598_2018_30696_MOESM1_ESM.pdf]

Supplementary Information

Including planoceric flatworms in the diet effectively toxifies the pufferfish,  
*Takifugu niphobles*

Shiro Itoi<sup>1</sup>, Hiroyuki Ueda<sup>1</sup>, Riko Yamada<sup>1</sup>, Mitsuki Takei<sup>1</sup>, Tatsunori Sato<sup>1</sup>, Shotaro Oshikiri<sup>1</sup>, Yoshiki Wajima<sup>1</sup>, Ryuya Ogata<sup>1</sup>, Hikaru Oyama<sup>1</sup>, Takahiro Shitto<sup>1</sup>, Kazuya Okuhara<sup>1</sup>, Tadasuke Tsunashima<sup>1</sup>, Eitaro Sawayama<sup>2</sup>, Haruo Sugita<sup>1</sup>

<sup>1</sup> *Department of Marine Science and Resources, Nihon University, Fujisawa, Kanagawa 252-0880, Japan*

<sup>2</sup> *R&D Division, Marua Suisan Co., Ltd. Kamijima, Ehime 794-2410, Japan*

Correspondence and requests for materials should be addressed to S.I. (e-mail: [sitoy@nihon-u.ac.jp](mailto:sitoy@nihon-u.ac.jp))

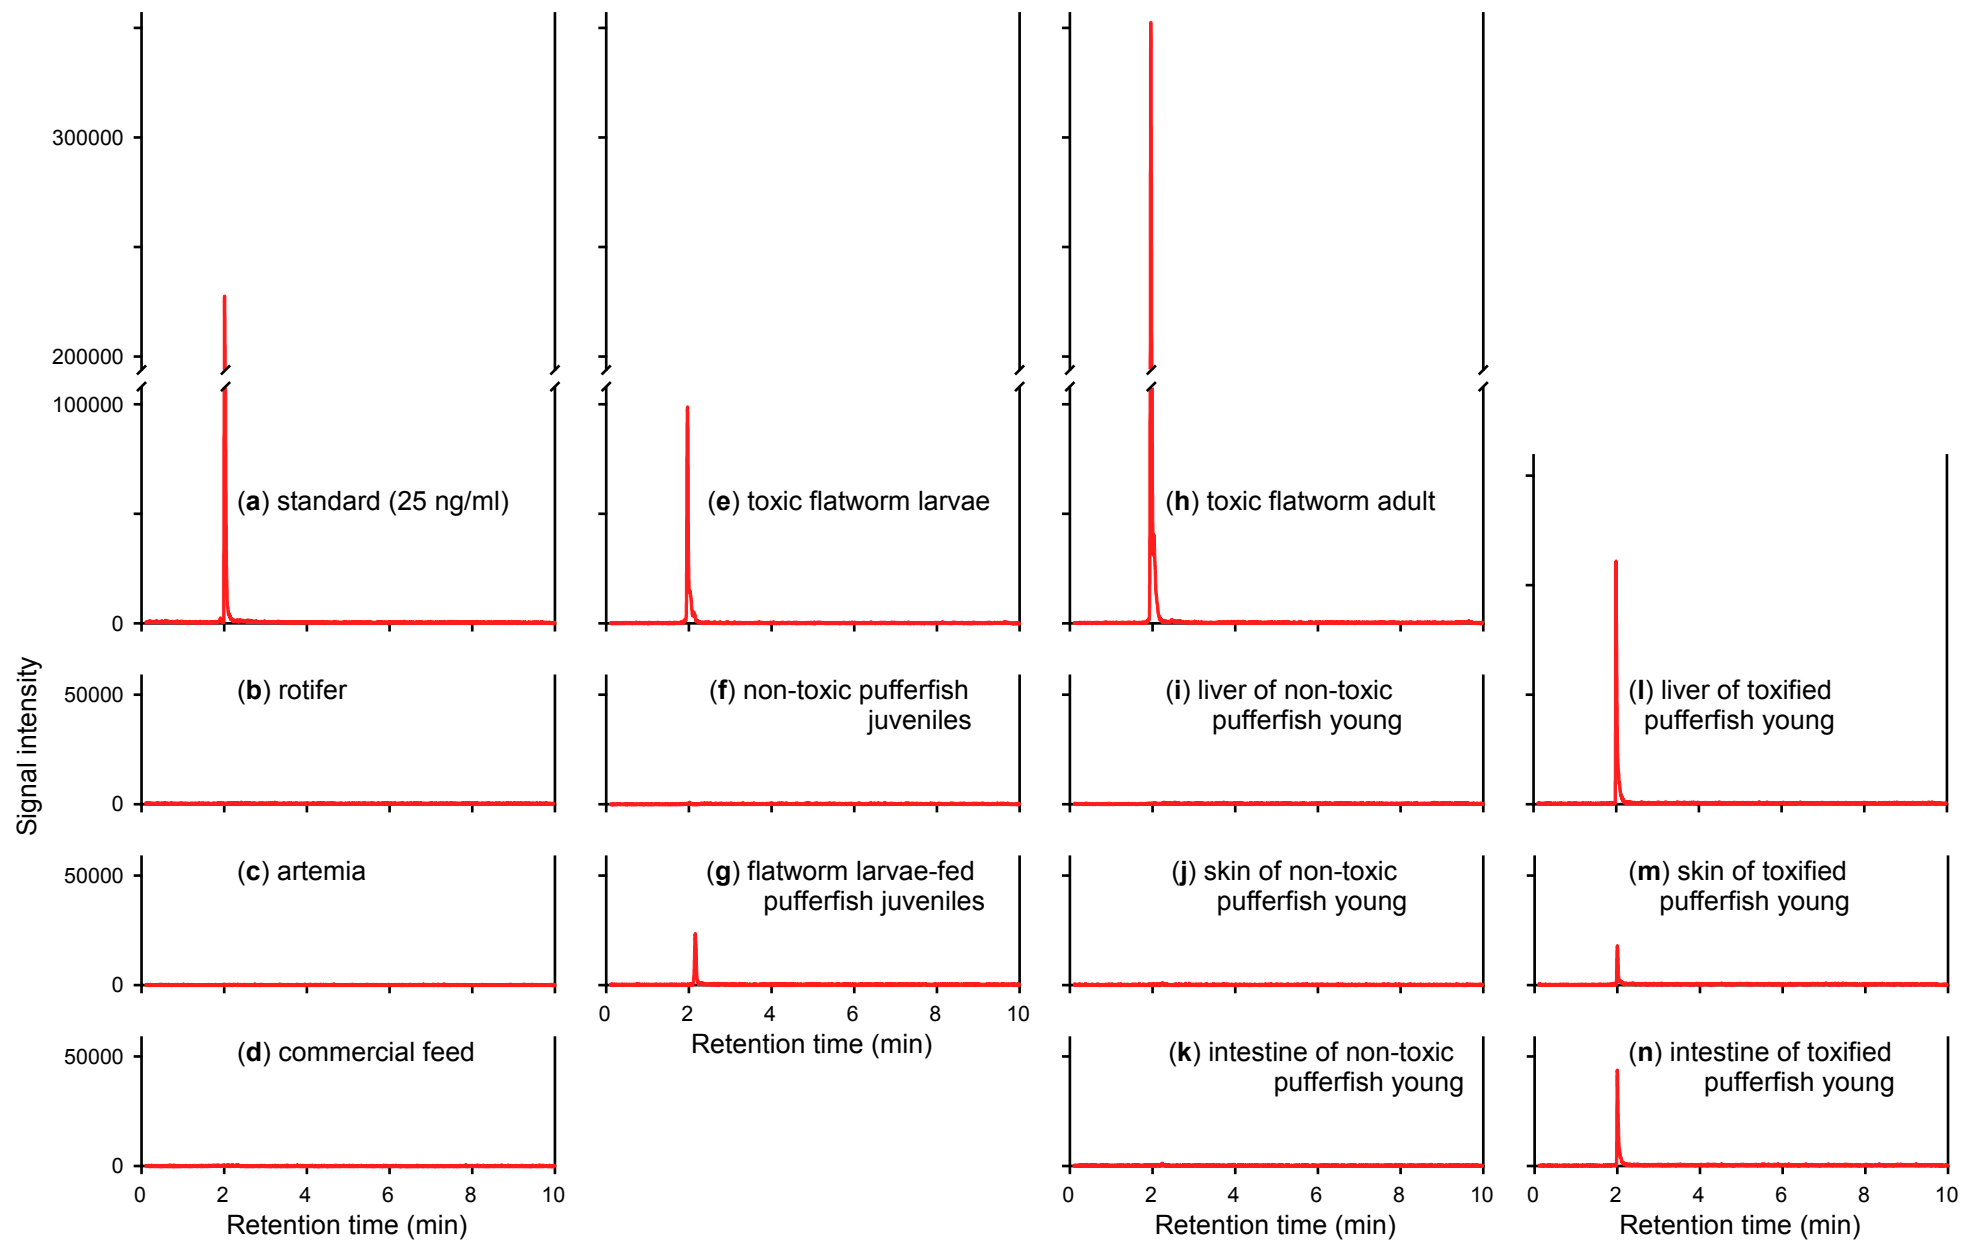

Fig. S1. Typical mass chromatograms of the LC-MS/MS obtained under MRM mode ( $m/z$  320 > 302). MRM patterns of 25 ng/ml TTX standard (**a**), the extract from the rotifer (**b**), the extract from the artemia (**c**), the extract from the commercial feed (**d**), the extract from the toxic flatworm larvae (**e**), the extract from the non-toxic *T. niphobles* juveniles cultured with only commercial feed (**f**), the extract from pufferfish juvenile fed with the toxic flatworm larvae (**g**), the extract from the toxic flatworm adult (**h**), the extract from the non-toxic *T. niphobles* young cultured with only commercial feed (**i**, liver; **j**, skin; **k**, intestine), and the extract from the toxic flatworm adult fed-pufferfish young (**l**, liver; **m**, skin; **n**, intestine).

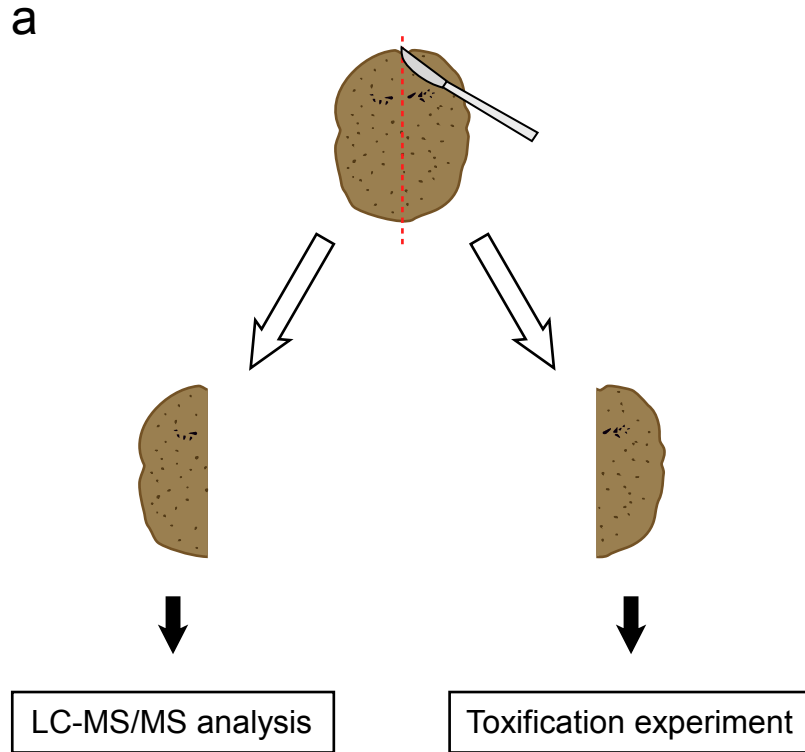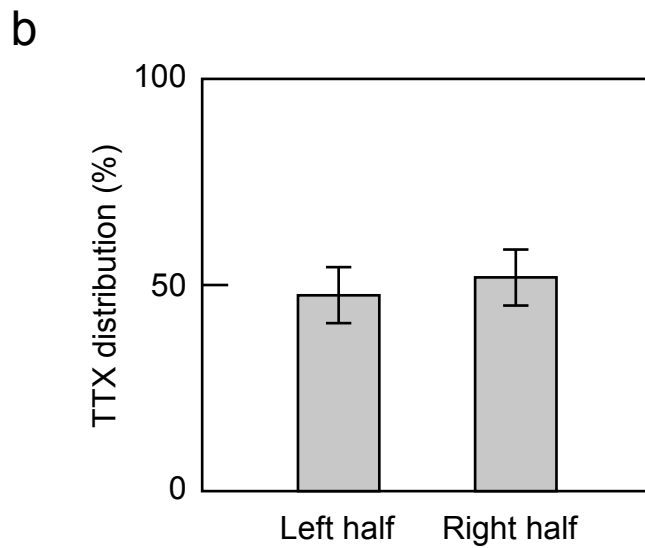

Fig. S2. How to cut the flatworm in half (**a**) and the toxin levels of left and right halves (**b**). In the preliminary experiment, the TTX contents in both halves of individual adults were measured ( $n = 9$ ). After confirmation that the toxin levels were equivalent in each half, half the body was subjected to LC-MS/MS analysis, and the remaining half was used for the predation experiments. Bars represent means  $\pm$  standard deviation.

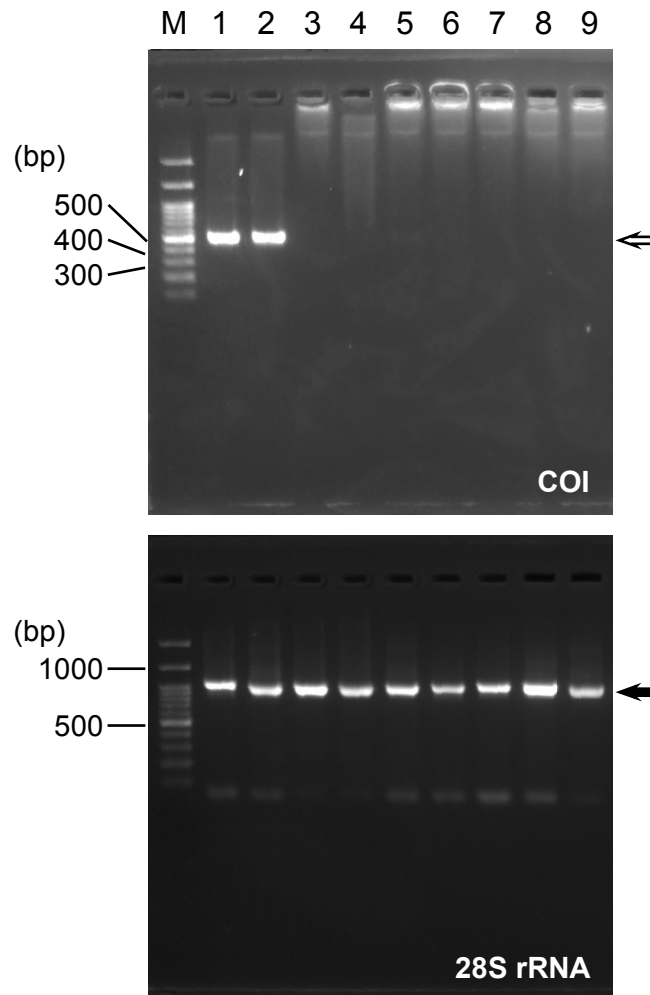

Fig. S3. Full-length gel electrophoretic pattern of PCR products from *Planocera multitentaculata* and various flatworm species shown in Fig. 1. White arrow indicates PCR products specific to *P. multitentaculata*, and black arrow indicates those common to various flatworm species. Lane M, molecular weight marker; lanes 1 and 2, *P. multitentaculata*; lane 3, *Planocera reticulata*; lane 4, *Planocera* sp.; lane 5, *Paraplanocera oligoglana*; lane 6, *Callioplana marginata*; lane 7, *Discoplana gigas*; lane 8, *Pseudostylochus obscurus*; lane 9, *Notocomplana humilis*.

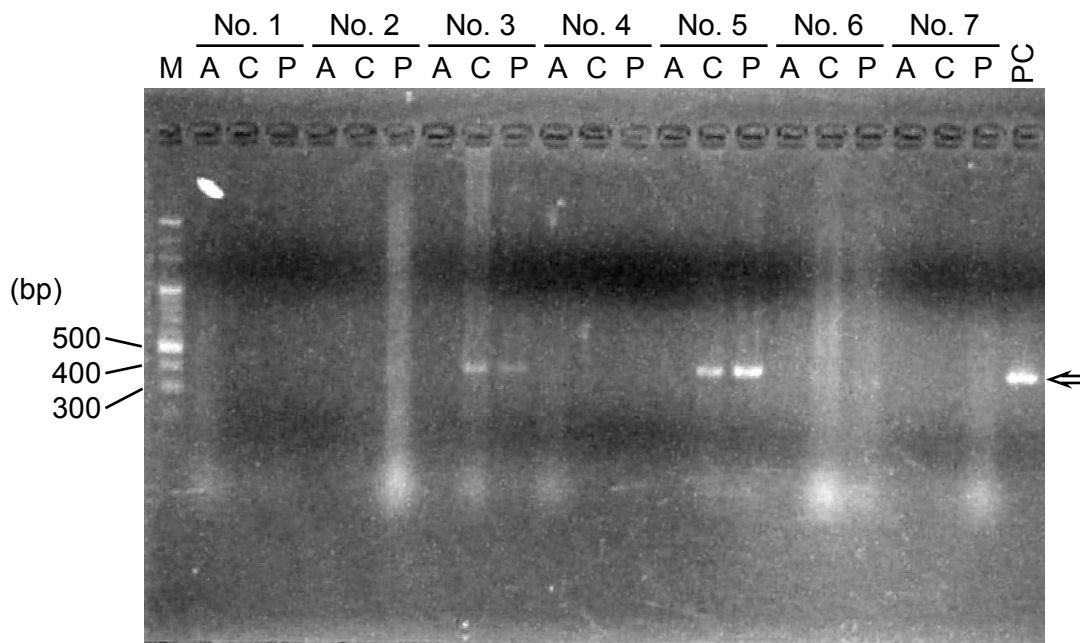

Fig. S4. Full-length gel electrophoretic pattern of PCR products from *Planocera multitentaculata* in the intestinal contents of seven young wild *Takifugu niphobles* individuals shown in Fig. 2. The arrow indicates PCR products specific to *P. multitentaculata*. Lane M: molecular weight marker; lane A: anterior part of the intestine; lane C: middle part of the intestine; lane P, posterior part of the intestine; lane PC, positive control (*P. multitentaculata*).

Table S1. DNA sequences from the intestinal contents of the pufferfish *Takifugu niphobles* juveniles collected at Katase in July 2016 <sup>1</sup>

| Organism                            | Classification                    | Accession No. | Sequence identity (%) | Number of sequences from pufferfish ind.: |        |       |
|-------------------------------------|-----------------------------------|---------------|-----------------------|-------------------------------------------|--------|-------|
|                                     |                                   |               |                       | No. 1                                     | No. 2  | No. 3 |
| TTX-bearing organisms               |                                   |               |                       |                                           |        |       |
| <i>Planocera multitentaculata</i>   | Platyhelminthes, Polycladida      | LC190986      | 99                    | 9873                                      | 70     | 35    |
| <i>Cynops pyrrhogaster</i>          | Vertebrata, Amphibia              | EU880313      | 90                    | 54                                        | 0      | 0     |
| <i>Yongeichthys criniger</i>        | Vertebrata, Teleostei             | KT894736      | 99                    | 0                                         | 3      | 6     |
| <i>Chelonodon patoca</i>            | Vertebrata, Teleostei             | KU692427      | 100                   | 3                                         | 0      | 2     |
| Non-toxic organisms                 |                                   |               |                       |                                           |        |       |
| <i>Amyntas tappensis</i>            | Annelida, Oligochaeta             | AB542551      | 92                    | 99                                        | 4      | 1     |
| <i>Lumbricus rubellus</i>           | Annelida, Oligochaeta             | KX790443      | 79                    | 309                                       | 75     | 64    |
| <i>Boccardiella hamata</i>          | Annelida, Polychaeta              | KP231329      | 80                    | 0                                         | 0      | 1005  |
| <i>Polydora cornuta</i>             | Annelida, Polychaeta              | AB636160      | 78                    | 171                                       | 392    | 548   |
| <i>Antrodiaetus pacificus</i>       | Arthropoda, Arachnida             | KP654824      | 81-83                 | 2875                                      | 0      | 565   |
| <i>Amphibalanus amphitrite</i>      | Arthropoda, Crustacea             | JQ035516      | 100                   | 0                                         | 0      | 12    |
| <i>Amphibalanus eburneus</i>        | Arthropoda, Crustacea             | KU695280      | 97-99                 | 501                                       | 128    | 172   |
| <i>Balanus trigonus</i>             | Arthropoda, Crustacea             | JQ035523      | 99                    | 991                                       | 17     | 0     |
| <i>Chthamalus challengerii</i>      | Arthropoda, Crustacea             | KM594046      | 99                    | 64                                        | 32     | 82    |
| <i>Penilia avirostris</i>           | Arthropoda, Crustacea             | KP136698      | 100                   | 79850                                     | 10927  | 20994 |
| <i>Amphioe valida</i>               | Arthropoda, Crustacea, Amphipoda  | JX545458      | 100                   | 0                                         | 0      | 183   |
| <i>Polynesoecetes kekeae</i>        | Arthropoda, Crustacea, Amphipoda  | KC706702      | 82                    | 0                                         | 0      | 286   |
| <i>Aoroides columbiae</i>           | Arthropoda, Crustacea, Amphipoda  | JX545451      | 83                    | 0                                         | 1348   | 5961  |
| <i>Erichthonius punctatus</i>       | Arthropoda, Crustacea, Amphipoda  | KT209486      | 83                    | 3                                         | 1028   | 42    |
| <i>Jassa marmorata</i>              | Arthropoda, Crustacea, Amphipoda  | KT601632      | 88                    | 0                                         | 64     | 0     |
| <i>Grandidierella japonica</i>      | Arthropoda, Crustacea, Amphipoda  | JX545464      | 100                   | 2                                         | 9732   | 60301 |
| <i>Melita nitida</i>                | Arthropoda, Crustacea, Amphipoda  | KF273565      | 99                    | 0                                         | 0      | 158   |
| <i>Monocorophium insidiosum</i>     | Arthropoda, Crustacea, Amphipoda  | KT209034      | 86-98                 | 1                                         | 7244   | 1431  |
| <i>Caligus curtus</i>               | Arthropoda, Crustacea, Copepoda   | KT209407      | 79                    | 0                                         | 138    | 0     |
| <i>Pseudodiptomus ishigakiensis</i> | Arthropoda, Crustacea, Copepoda   | AB576158      | 98                    | 14                                        | 26121  | 29    |
| <i>Paracalanus parvus</i>           | Arthropoda, Crustacea, Copepoda   | EU599545      | 97-100                | 386                                       | 467    | 12    |
| <i>Pseudevadne tergestina</i>       | Arthropoda, Crustacea, Copepoda   | EU675911      | 100                   | 422                                       | 0      | 159   |
| <i>Pseudodiptomus inopinus</i>      | Arthropoda, Crustacea, Copepoda   | JQ714055      | 97                    | 31                                        | 19544  | 0     |
| <i>Pseudodiptomus koreanus</i>      | Arthropoda, Crustacea, Copepoda   | JQ714054      | 96-97                 | 0                                         | 23677  | 55    |
| Sabelliphilidae sp.                 | Arthropoda, Crustacea, Copepoda   | KT030284      | 74                    | 0                                         | 69     | 25    |
| <i>Oxidus gracilis</i>              | Arthropoda, Diplopoda             | KU875705      | 91                    | 0                                         | 0      | 1     |
| <i>Amphinemura borealis</i>         | Arthropoda, Insecta               | KY262067      | 84                    | 5                                         | 0      | 0     |
| <i>Chathamia integripennis</i>      | Arthropoda, Insecta               | KX038240      | 82                    | 13                                        | 70     | 0     |
| <i>Procladius paludicola</i>        | Arthropoda, Insecta               | HQ248009      | 84                    | 0                                         | 0      | 365   |
| <i>Colletes compactus</i>           | Arthropoda, Insecta               | FJ582200      | 79                    | 0                                         | 0      | 6     |
| <i>Phyllotreta hemipoda</i>         | Arthropoda, Insecta               | KX943496      | 75                    | 42                                        | 0      | 0     |
| <i>Pseudonapomyza lacteipennis</i>  | Arthropoda, Insecta               | KR678719      | 84                    | 19                                        | 0      | 0     |
| <i>Asteromyia carbonifera</i>       | Arthropoda, Insecta               | JX417020      | 83                    | 280                                       | 0      | 309   |
| <i>Drosophila suzukii</i>           | Arthropoda, Insecta               | MG605095      | 78                    | 0                                         | 277    | 0     |
| <i>Chersodromia incana</i>          | Arthropoda, Insecta               | KJ082677      | 74                    | 0                                         | 0      | 1     |
| <i>Cyclotella</i> sp.               | Bacillariophyta, Thalassiosirales | KM202117      | 90                    | 72                                        | 0      | 0     |
| <i>Skeletonema costatum</i>         | Bacillariophyta, Thalassiosirales | LC222536      | 89-90                 | 179                                       | 0      | 0     |
| <i>Crassostrea gigas</i>            | Mollusca, Bivalvia                | KX436133      | 100                   | 0                                         | 5      | 0     |
| <i>Nassarius festivus</i>           | Mollusca, Gastropoda              | JQ975446      | 98                    | 105                                       | 0      | 0     |
| <i>Tritonoharpa angasi</i>          | Mollusca, Gastropoda              | FR717522      | 89                    | 221                                       | 0      | 6     |
| <i>Pyrgulopsis micrococcus</i>      | Mollusca, Gastropoda              | AY367469      | 79                    | 58                                        | 233    | 0     |
| <i>Reishia clavigera</i>            | Mollusca, Gastropoda              | KP116315      | 100                   | 534                                       | 7      | 0     |
| Platyhelminthes sp.                 | Platyhelminthes, Polycladida      | KP254635      | 81                    | 0                                         | 0      | 47    |
| Unidentified sequences              |                                   |               |                       | 161                                       | 0      | 1     |
| Total number of sequences           |                                   |               |                       | 97338                                     | 101672 | 92864 |

<sup>1</sup> The pufferfish juveniles were randomly selected from the specimens collected at Katase in July 2016, represented in Table 1. DNA sequences are included in supplementary file "NGS\_seq(2016).docx". OTU IDs are represented in Table S2.

Table S2. Number of DNA sequence (OTU ID) from the intestinal contents of the pufferfish *Takifugu niphobles* juveniles collected at Katase in July 2016 <sup>1</sup>

| Organism <sup>2</sup>               | OTU ID                             | Number of sequences from: |              |              |
|-------------------------------------|------------------------------------|---------------------------|--------------|--------------|
|                                     |                                    | Pufferfish 1              | Pufferfish 2 | Pufferfish 3 |
| TTX-bearing organisms               |                                    |                           |              |              |
| <i>Planocera multitentaculata</i>   | OTU_2                              | 9873                      | 70           | 35           |
| <i>Cynops pyrrhogaster</i>          | OTU_12                             | 54                        | 0            | 0            |
| <i>Yongeichthys criniger</i>        | OTU_1                              | 0                         | 3            | 6            |
| <i>Chelonodon patoca</i>            | OTU_3                              | 3                         | 0            | 2            |
| Non-toxic organisms                 |                                    |                           |              |              |
| <i>Amyntas tappensis</i>            | OTU_4                              | 99                        | 4            | 1            |
| <i>Lumbricus rubellus</i>           | OTU_72                             | 309                       | 75           | 64           |
| <i>Boccardiella hamata</i>          | OTU_42                             | 0                         | 0            | 1005         |
| <i>Polydora cornuta</i>             | OTU_44                             | 171                       | 392          | 548          |
| <i>Antrodiaetus pacificus</i>       | OTU_32                             | 2875                      | 0            | 565          |
| <i>Amphibalanus amphitrite</i>      | OTU_266                            | 0                         | 0            | 12           |
| <i>Amphibalanus eburneus</i>        | OTU_51 and 245                     | 501                       | 128          | 172          |
| <i>Balanus trigonus</i>             | OTU_48                             | 991                       | 17           | 0            |
| <i>Chthamalus challengerii</i>      | OTU_130                            | 64                        | 32           | 82           |
| <i>Penilia avirostris</i>           | OTU_6                              | 79850                     | 10927        | 20994        |
| <i>Ampithoe valida</i>              | OTU_77                             | 0                         | 0            | 183          |
| <i>Polynesoecetes kekeae</i>        | OTU_70                             | 0                         | 0            | 286          |
| <i>Aoroides columbiae</i>           | OTU_25                             | 0                         | 1348         | 5961         |
| <i>Erichthonius punctatus</i>       | OTU_45                             | 3                         | 1028         | 42           |
| <i>Jassa marmorata</i>              | OTU_143                            | 0                         | 64           | 0            |
| <i>Grandidierella japonica</i>      | OTU_9 and 11                       | 2                         | 9732         | 60301        |
| <i>Melita nitida</i>                | OTU_79                             | 0                         | 0            | 158          |
| <i>Monocorophium insidiosum</i>     | OTU_15, 53, 64 and 91              | 1                         | 7244         | 1431         |
| <i>Caligus curtus</i>               | OTU_86                             | 0                         | 138          | 0            |
| <i>Pseudodiptomus ishigakiensis</i> | OTU_24                             | 14                        | 26121        | 29           |
| <i>Paracalanus parvus</i>           | OTU_67 and 348                     | 386                       | 467          | 12           |
| <i>Pseudevadne tergestina</i>       | OTU_83                             | 422                       | 0            | 159          |
| <i>Pseudodiptomus inopinus</i>      | OTU_18 and 355                     | 31                        | 19544        | 0            |
| <i>Pseudodiptomus koreanus</i>      | OTU_16 and 35                      | 0                         | 23677        | 55           |
| Sabelliphilidae sp.                 | OTU_102                            | 0                         | 69           | 25           |
| <i>Oxidus gracilis</i>              | OTU_13                             | 0                         | 0            | 1            |
| <i>Amphinemura borealis</i>         | OTU_10                             | 5                         | 0            | 0            |
| <i>Chathamia integripennis</i>      | OTU_101 and 111                    | 13                        | 70           | 0            |
| <i>Procladius paludicola</i>        | OTU_59                             | 0                         | 0            | 365          |
| <i>Colletes compactus</i>           | OTU_307                            | 0                         | 0            | 6            |
| <i>Phyllotreta hemipoda</i>         | OTU_149                            | 42                        | 0            | 0            |
| <i>Pseudonapomyza lacteipennis</i>  | OTU_248                            | 19                        | 0            | 0            |
| <i>Asteromyia carbonifera</i>       | OTU_55                             | 280                       | 0            | 309          |
| <i>Drosophila suzukii</i>           | OTU_65                             | 0                         | 277          | 0            |
| <i>Chersodromia incana</i>          | OTU_19                             | 0                         | 0            | 1            |
| <i>Cyclotella</i> sp.               | OTU_116                            | 72                        | 0            | 0            |
| <i>Skeletonema costatum</i>         | OTU_114 and 145                    | 179                       | 0            | 0            |
| <i>Crassostrea gigas</i>            | OTU_420                            | 0                         | 5            | 0            |
| <i>Nassarius festivus</i>           | OTU_106                            | 105                       | 0            | 0            |
| <i>Tritonoharpa angasi</i>          | OTU_76                             | 221                       | 0            | 6            |
| <i>Pyrgulopsis micrococcus</i>      | OTU_80                             | 58                        | 233          | 0            |
| <i>Reishia clavigera</i>            | OTU_8                              | 534                       | 7            | 0            |
| Platyhelminthes sp.                 | OTU_125                            | 0                         | 0            | 47           |
| Unidentified sequences              | OTU_20, 144, 168, 197, 211 and 254 | 161                       | 0            | 1            |
| Total number of sequences           |                                    | 97338                     | 101672       | 92864        |

<sup>1</sup> The pufferfish juveniles were randomly selected from the specimens collected at Katase in July 2016, represented in Table 1.

<sup>2</sup> Organisms named as presented in Table S1.

Table S3. DNA sequences from the intestinal contents of the pufferfish *Takifugu niphobles* juveniles collected at Katase in July 2017 <sup>1</sup>

| Organism                                 | Classification               | Acc. No. | Sequence identity (%) | Number of sequences from pufferfish individual: |       |       |       |       |       |       |       |       |
|------------------------------------------|------------------------------|----------|-----------------------|-------------------------------------------------|-------|-------|-------|-------|-------|-------|-------|-------|
|                                          |                              |          |                       | No. 1                                           | No. 2 | No. 3 | No. 4 | No. 5 | No. 6 | No. 7 | No. 8 | No. 9 |
| TTX-bearing organisms                    |                              |          |                       |                                                 |       |       |       |       |       |       |       |       |
| <i>Planocera multitentaculata</i>        | Platyhelminthes, Polycladida | LC190986 | 100                   | 0                                               | 0     | 0     | 936   | 0     | 272   | 833   | 0     | 0     |
| <i>Cephalothrix simula</i>               | Nemertea, Cephalothrix       | GU726607 | 86                    | 0                                               | 0     | 0     | 0     | 0     | 2     | 0     | 0     | 0     |
| <i>Rapana venosa</i>                     | Mollusca, Gastropoda         | KP976378 | 100                   | 0                                               | 0     | 0     | 101   | 0     | 0     | 2     | 0     | 0     |
| Non-toxic organisms                      |                              |          |                       |                                                 |       |       |       |       |       |       |       |       |
| <i>Eophila gestroi</i>                   | Annelida, Oligochaeta        | KT352938 | 81                    | 0                                               | 0     | 120   | 2051  | 767   | 3964  | 9672  | 0     | 0     |
| <i>Fitzingeria platyura</i>              | Annelida, Oligochaeta        | KX651141 | 83                    | 0                                               | 0     | 0     | 167   | 15    | 256   | 783   | 0     | 0     |
| Lumbricidae sp.                          | Annelida, Oligochaeta        | GU014023 | 80                    | 1                                               | 0     | 80    | 161   | 340   | 967   | 1581  | 2285  | 2773  |
| <i>Lumbricus rubellus</i>                | Annelida, Oligochaeta        | KX790443 | 79                    | 2964                                            | 0     | 3303  | 2951  | 5312  | 10777 | 15506 | 12539 | 5118  |
| <i>Metaphire sieboldi</i>                | Annelida, Oligochaeta        | AB482099 | 81                    | 0                                               | 0     | 0     | 0     | 0     | 115   | 0     | 0     | 0     |
| <i>Travoscolides chengannures</i>        | Annelida, Oligochaeta        | KX832079 | 80                    | 0                                               | 0     | 0     | 0     | 0     | 0     | 73    | 0     | 0     |
| <i>Tubificoides diazi</i>                | Annelida, Oligochaeta        | KP254080 | 80                    | 0                                               | 0     | 0     | 0     | 0     | 27    | 0     | 0     | 0     |
| <i>Enipo</i> sp.                         | Annelida, Polychaeta         | HQ023871 | 82                    | 0                                               | 0     | 0     | 0     | 0     | 0     | 256   | 0     | 0     |
| <i>Eumida alkyone</i>                    | Annelida, Polychaeta         | HM358691 | 91                    | 0                                               | 0     | 0     | 0     | 0     | 15    | 0     | 0     | 0     |
| <i>Eumida longicornuta</i>               | Annelida, Polychaeta         | JQ623499 | 88                    | 0                                               | 0     | 0     | 0     | 34    | 0     | 25    | 0     | 538   |
| <i>Gastrolepidia clavigera</i>           | Annelida, Polychaeta         | KC706796 | 81                    | 0                                               | 0     | 0     | 0     | 3     | 0     | 4     | 0     | 0     |
| <i>Harmothoe fuliginum</i>               | Annelida, Polychaeta         | KX867415 | 86                    | 0                                               | 0     | 0     | 0     | 52    | 0     | 0     | 0     | 0     |
| <i>Lumbrineris</i> sp.                   | Annelida, Polychaeta         | KR916858 | 75                    | 0                                               | 0     | 0     | 0     | 0     | 54    | 0     | 0     | 0     |
| <i>Malacoceros fuliginosus</i>           | Annelida, Polychaeta         | EF432012 | 85                    | 0                                               | 0     | 0     | 0     | 0     | 0     | 152   | 20    | 0     |
| <i>Marenzelleria arctia</i>              | Annelida, Polychaeta         | EF137728 | 86                    | 0                                               | 0     | 0     | 0     | 0     | 34    | 21    | 138   | 0     |
| <i>Mediomastus</i> sp.                   | Annelida, Polychaeta         | EU835672 | 79                    | 0                                               | 0     | 0     | 0     | 20    | 146   | 2     | 2     | 0     |
| <i>Micropodarke dubia</i>                | Annelida, Polychaeta         | JN571825 | 100                   | 0                                               | 0     | 0     | 71    | 0     | 0     | 0     | 0     | 0     |
| <i>Nephtys hombergii</i>                 | Annelida, Polychaeta         | KR916886 | 82                    | 0                                               | 0     | 0     | 0     | 0     | 28    | 2     | 0     | 0     |
| <i>Notophyllum crypticum</i>             | Annelida, Polychaeta         | GQ464342 | 85                    | 0                                               | 0     | 0     | 0     | 30    | 0     | 0     | 0     | 0     |
| <i>Paraprionospio patiens</i>            | Annelida, Polychaeta         | KU661499 | 95                    | 0                                               | 0     | 17    | 0     | 0     | 3     | 0     | 0     | 0     |
| <i>Polydora cornuta</i>                  | Annelida, Polychaeta         | AB636160 | 78-79                 | 0                                               | 0     | 877   | 314   | 101   | 148   | 1343  | 543   | 136   |
| <i>Polydora haswelli</i>                 | Annelida, Polychaeta         | KP231333 | 96-100                | 0                                               | 0     | 0     | 0     | 0     | 0     | 201   | 105   | 0     |
| <i>Polydora hoplura</i>                  | Annelida, Polychaeta         | KY677864 | 85-89                 | 0                                               | 0     | 0     | 35    | 19    | 511   | 156   | 105   | 0     |
| <i>Polydora websteri</i>                 | Annelida, Polychaeta         | KR337462 | 81-99                 | 0                                               | 0     | 0     | 185   | 14    | 29    | 184   | 3     | 734   |
| <i>Sabellaria</i> sp.                    | Annelida, Polychaeta         | KX525585 | 88                    | 0                                               | 2922  | 14    | 0     | 174   | 240   | 28    | 0     | 0     |
| <i>Scolelepis daphoinos</i>              | Annelida, Polychaeta         | GU362687 | 88                    | 0                                               | 0     | 0     | 0     | 0     | 0     | 48    | 0     | 0     |
| <i>Spiochaetopterus</i> sp.              | Annelida, Polychaeta         | KX525515 | 83                    | 0                                               | 0     | 0     | 0     | 0     | 784   | 0     | 0     | 0     |
| Eupodiidae sp.                           | Arthropoda, Chelicerata      | JX838561 | 79                    | 0                                               | 0     | 33    | 0     | 0     | 0     | 0     | 0     | 0     |
| <i>Sericosura curva</i>                  | Arthropoda, Chelicerata      | KP835344 | 77                    | 0                                               | 0     | 0     | 0     | 0     | 86    | 0     | 0     | 0     |
| <i>Amphibalanus amphitrite</i>           | Arthropoda, Crustacea        | JQ035516 | 99                    | 0                                               | 0     | 3     | 1     | 1     | 0     | 14    | 6     | 192   |
| <i>Amphibalanus eburneus</i>             | Arthropoda, Crustacea        | KU695280 | 98-99                 | 0                                               | 0     | 110   | 0     | 10    | 50    | 30    | 0     | 97    |
| <i>Amphibalanus improvisus</i>           | Arthropoda, Crustacea        | KT209079 | 100                   | 507                                             | 0     | 180   | 5     | 2439  | 189   | 104   | 34    | 300   |
| Amphipoda sp.                            | Arthropoda, Crustacea        | GQ260850 | 84                    | 0                                               | 0     | 0     | 0     | 0     | 0     | 0     | 40    | 0     |
| <i>Arcotheres sinensis</i>               | Arthropoda, Crustacea        | JX502950 | 99                    | 0                                               | 0     | 247   | 0     | 0     | 0     | 0     | 1130  | 0     |
| <i>Austrochiltonia</i> sp.               | Arthropoda, Crustacea        | JX900273 | 83                    | 0                                               | 0     | 0     | 0     | 0     | 0     | 0     | 11    | 0     |
| <i>Balanus trigonus</i>                  | Arthropoda, Crustacea        | JQ035523 | 100                   | 2324                                            | 0     | 1932  | 15    | 0     | 655   | 343   | 373   | 7142  |
| <i>Caridea</i> sp.                       | Arthropoda, Crustacea        | HM466029 | 76                    | 0                                               | 0     | 88    | 0     | 0     | 0     | 0     | 0     | 0     |
| <i>Chthamalus</i> cf. <i>challengeri</i> | Arthropoda, Crustacea        | AY823019 | 100                   | 0                                               | 0     | 0     | 23926 | 21498 | 18083 | 1955  | 0     | 0     |



|                                        |                                 |          |        |       |       |       |       |       |      |      |       |       |
|----------------------------------------|---------------------------------|----------|--------|-------|-------|-------|-------|-------|------|------|-------|-------|
| <i>Chthamalus proteus</i>              | Arthropoda, Crustacea           | AY822966 | 83     | 0     | 0     | 135   | 0     | 0     | 0    | 0    | 0     | 0     |
| <i>Corophium multisetosum</i>          | Arthropoda, Crustacea           | KX224017 | 83     | 0     | 0     | 0     | 0     | 0     | 182  | 0    | 0     | 0     |
| <i>Cryptopodia angulata</i>            | Arthropoda, Crustacea           | KF241718 | 84     | 0     | 0     | 0     | 88    | 0     | 0    | 0    | 0     | 0     |
| <i>Evadne spinifera</i>                | Arthropoda, Crustacea           | KT208687 | 98     | 0     | 0     | 0     | 0     | 0     | 4    | 5    | 0     | 0     |
| <i>Fistulobalanus albicostatus</i>     | Arthropoda, Crustacea           | KU977407 | 100    | 0     | 0     | 369   | 23258 | 23294 | 4564 | 226  | 17    | 0     |
| <i>Gaetice depressus</i>               | Arthropoda, Crustacea           | HM180589 | 100    | 0     | 0     | 0     | 0     | 0     | 49   | 0    | 0     | 0     |
| <i>Grandidierella japonica</i>         | Arthropoda, Crustacea           | JX545464 | 100    | 0     | 0     | 0     | 0     | 0     | 0    | 227  | 453   | 0     |
| <i>Hemigrapsus sanguineus</i>          | Arthropoda, Crustacea           | KT307116 | 100    | 0     | 0     | 0     | 0     | 0     | 22   | 0    | 0     | 0     |
| <i>Hemigrapsus takanoi</i>             | Arthropoda, Crustacea           | KT208924 | 100    | 0     | 0     | 0     | 0     | 0     | 0    | 0    | 2004  | 0     |
| <i>Hyperacanthomysis longirostris</i>  | Arthropoda, Crustacea           | HM045290 | 85     | 0     | 0     | 0     | 0     | 0     | 0    | 240  | 0     | 0     |
| Isopoda sp.                            | Arthropoda, Crustacea           | HM180631 | 96     | 0     | 0     | 0     | 43    | 0     | 0    | 0    | 0     | 0     |
| <i>Leptodius nigromaculatus</i>        | Arthropoda, Crustacea           | HM751003 | 100    | 0     | 0     | 677   | 0     | 0     | 196  | 1236 | 116   | 2544  |
| <i>Metapenaeopsis mogiensis</i>        | Arthropoda, Crustacea           | KR150459 | 99     | 0     | 0     | 0     | 0     | 0     | 179  | 0    | 0     | 0     |
| <i>Monocorophium insidiosum</i>        | Arthropoda, Crustacea           | KT209034 | 86-100 | 0     | 0     | 3183  | 0     | 2     | 0    | 0    | 589   | 0     |
| <i>Pachygrapsus crassipes</i>          | Arthropoda, Crustacea           | AY952139 | 99     | 0     | 0     | 607   | 47    | 17    | 1075 | 143  | 23265 | 0     |
| <i>Penilia avirostris</i>              | Arthropoda, Crustacea           | HM045341 | 99     | 0     | 0     | 0     | 0     | 0     | 1    | 0    | 11    | 0     |
| <i>Penilia avirostris</i>              | Arthropoda, Crustacea           | KP136698 | 100    | 2173  | 17521 | 675   | 229   | 4394  | 7148 | 2125 | 3047  | 2433  |
| <i>Pleopis polyphemoides</i>           | Arthropoda, Crustacea           | EU675896 | 100    | 0     | 0     | 0     | 0     | 0     | 13   | 0    | 0     | 0     |
| <i>Plesionika quasigrandis</i>         | Arthropoda, Crustacea           | KM096448 | 79     | 0     | 0     | 0     | 0     | 0     | 0    | 4    | 0     | 0     |
| <i>Pseudevadne tergestina</i>          | Arthropoda, Crustacea           | EU675911 | 100    | 0     | 0     | 0     | 0     | 102   | 1537 | 5070 | 0     | 0     |
| <i>Sesarma reticulatum</i>             | Arthropoda, Crustacea           | EU329170 | 92     | 12981 | 0     | 26417 | 197   | 94    | 1204 | 483  | 272   | 6470  |
| <i>Tetraclita japonica</i>             | Arthropoda, Crustacea           | DQ647753 | 99     | 0     | 0     | 0     | 0     | 21    | 0    | 0    | 0     | 0     |
| <i>Thalestris longimana</i>            | Arthropoda, Crustacea           | KT208624 | 77     | 41    | 0     | 0     | 0     | 0     | 0    | 0    | 0     | 0     |
| <i>Trevathana dongshaensis</i>         | Arthropoda, Crustacea           | KY439840 | 91     | 0     | 0     | 0     | 0     | 23    | 52   | 0    | 0     | 0     |
| <i>Acartia tsuensis</i>                | Arthropoda, Crustacea, Copepoda | KC287425 | 98     | 1718  | 0     | 48    | 0     | 0     | 0    | 4    | 198   | 230   |
| <i>Clausocalanus furcatus</i>          | Arthropoda, Crustacea, Copepoda | KC287559 | 100    | 0     | 0     | 0     | 0     | 0     | 45   | 0    | 0     | 0     |
| <i>Cyclops kikuchii</i>                | Arthropoda, Crustacea, Copepoda | KR048967 | 100    | 0     | 791   | 0     | 0     | 0     | 0    | 0    | 0     | 98    |
| <i>Labidocera japonica</i>             | Arthropoda, Crustacea, Copepoda | JQ714069 | 97     | 0     | 0     | 0     | 0     | 0     | 17   | 0    | 0     | 0     |
| <i>Longipedia kikuchii</i>             | Arthropoda, Crustacea, Copepoda | KR049012 | 90-99  | 1887  | 0     | 3678  | 0     | 0     | 0    | 0    | 58    | 12611 |
| <i>Mastigodiptomus albuquerquensis</i> | Arthropoda, Crustacea, Copepoda | KC617098 | 79     | 0     | 0     | 0     | 0     | 0     | 0    | 0    | 0     | 36    |
| <i>Mospicalanus</i> sp.                | Arthropoda, Crustacea, Copepoda | KU247786 | 82     | 0     | 0     | 63    | 0     | 0     | 0    | 0    | 0     | 0     |
| <i>Oithona dissimilis</i>              | Arthropoda, Crustacea, Copepoda | AB604159 | 77     | 241   | 0     | 0     | 0     | 0     | 0    | 0    | 0     | 0     |
| <i>Paracalanus aculeatus</i>           | Arthropoda, Crustacea, Copepoda | KC287803 | 96     | 0     | 0     | 0     | 0     | 3     | 5    | 0    | 0     | 0     |
| <i>Paracalanus parvus</i>              | Arthropoda, Crustacea, Copepoda | EU856803 | 100    | 0     | 0     | 307   | 46    | 0     | 623  | 112  | 0     | 235   |
| <i>Paracalanus tropicus</i>            | Arthropoda, Crustacea, Copepoda | KF715939 | 97     | 0     | 0     | 0     | 0     | 0     | 0    | 6    | 0     | 0     |
| <i>Paracyclopsina nana</i>             | Arthropoda, Crustacea, Copepoda | EU877959 | 77     | 0     | 0     | 0     | 0     | 0     | 0    | 0    | 0     | 136   |
| <i>Pseudodiptomus inopinus</i>         | Arthropoda, Crustacea, Copepoda | JQ714055 | 97     | 4734  | 0     | 295   | 0     | 0     | 0    | 0    | 14    | 4817  |
| <i>Pseudodiptomus ishigakiensis</i>    | Arthropoda, Crustacea, Copepoda | AB576158 | 97     | 0     | 0     | 215   | 4     | 0     | 20   | 12   | 17    | 808   |
| <i>Pseudodiptomus koreanus</i>         | Arthropoda, Crustacea, Copepoda | JQ714054 | 96-98  | 6926  | 0     | 1139  | 0     | 0     | 0    | 0    | 991   | 2067  |
| <i>Pseudodiptomus marinus</i>          | Arthropoda, Crustacea, Copepoda | KT209405 | 100    | 0     | 0     | 83    | 0     | 0     | 0    | 0    | 167   | 0     |
| <i>Bradysia hilariformis</i>           | Arthropoda, Insecta             | JQ613827 | 80     | 0     | 0     | 649   | 0     | 0     | 0    | 0    | 0     | 0     |
| <i>Chaetocladus perennis</i>           | Arthropoda, Insecta             | KR756465 | 82     | 0     | 0     | 0     | 0     | 0     | 0    | 16   | 0     | 0     |
| <i>Chazara briseis</i>                 | Arthropoda, Insecta             | FJ663347 | 79     | 0     | 0     | 0     | 54    | 46    | 0    | 105  | 0     | 0     |
| <i>Corynoneura</i> sp.                 | Arthropoda, Insecta             | JF286782 | 85     | 0     | 0     | 0     | 0     | 0     | 0    | 131  | 0     | 0     |
| Diptera sp.                            | Arthropoda, Insecta             | KP421238 | 78     | 0     | 0     | 0     | 0     | 65    | 0    | 0    | 0     | 0     |
| <i>Heliconius sara</i>                 | Arthropoda, Insecta             | KP848964 | 82     | 0     | 0     | 0     | 0     | 0     | 0    | 11   | 0     | 0     |

|                                    |                              |          |     |       |       |       |       |       |       |       |       |       |
|------------------------------------|------------------------------|----------|-----|-------|-------|-------|-------|-------|-------|-------|-------|-------|
| <i>Leuctra grandis</i>             | Arthropoda, Insecta          | JN200609 | 74  | 0     | 0     | 0     | 0     | 0     | 0     | 0     | 0     | 482   |
| <i>Lysimelia neleusalis</i>        | Arthropoda, Insecta          | JN401276 | 82  | 0     | 0     | 0     | 0     | 0     | 0     | 0     | 0     | 55    |
| Orthoclaadiinae sp.                | Arthropoda, Insecta          | KR757067 | 80  | 0     | 0     | 0     | 304   | 0     | 0     | 0     | 0     | 0     |
| Orthoclaadiinae sp.                | Arthropoda, Insecta          | KR591648 | 77  | 160   | 0     | 138   | 0     | 0     | 0     | 0     | 1     | 107   |
| <i>Pintomyia fischeri</i>          | Arthropoda, Insecta          | AB984434 | 78  | 1910  | 0     | 0     | 0     | 0     | 0     | 0     | 0     | 0     |
| <i>Polypedilum cultellatum</i>     | Arthropoda, Insecta          | AB838682 | 100 | 0     | 0     | 0     | 0     | 20    | 0     | 0     | 0     | 0     |
| <i>Probergrothius sexpunctatus</i> | Arthropoda, Insecta          | KX523454 | 79  | 0     | 0     | 0     | 0     | 0     | 0     | 0     | 153   | 0     |
| <i>Pseudonapomyza lacteipennis</i> | Arthropoda, Insecta          | KR678719 | 84  | 0     | 0     | 0     | 15    | 1     | 0     | 0     | 0     | 0     |
| <i>Smittia nudipennis</i>          | Arthropoda, Insecta          | HQ105350 | 75  | 0     | 0     | 48    | 0     | 0     | 0     | 0     | 0     | 0     |
| <i>Spialia orbifer</i>             | Arthropoda, Insecta          | KU905500 | 80  | 0     | 0     | 0     | 0     | 0     | 0     | 0     | 24    | 0     |
| <i>Brachidontes pharaonis</i>      | Mollusca, Bivalvia           | AJ865698 | 84  | 0     | 0     | 164   | 0     | 0     | 0     | 0     | 0     | 0     |
| <i>Crassostrea gigas</i>           | Mollusca, Bivalvia           | KT988318 | 100 | 0     | 0     | 409   | 1445  | 1903  | 1199  | 125   | 30    | 0     |
| <i>Dendostrea crenulifera</i>      | Mollusca, Bivalvia           | KC683510 | 98  | 0     | 0     | 0     | 66    | 204   | 33    | 0     | 0     | 0     |
| <i>Ostrea circumpicta</i>          | Mollusca, Bivalvia           | KP067904 | 100 | 0     | 0     | 0     | 0     | 6     | 0     | 0     | 0     | 53    |
| <i>Ostrea stentina</i>             | Mollusca, Bivalvia           | LC051589 | 100 | 0     | 0     | 89    | 0     | 0     | 33    | 0     | 0     | 0     |
| <i>Pseudopythina subsinuata</i>    | Mollusca, Bivalvia           | AB714897 | 87  | 0     | 0     | 0     | 0     | 0     | 106   | 0     | 0     | 0     |
| <i>Xenostrobus atratus</i>         | Mollusca, Bivalvia           | AB298598 | 98  | 0     | 0     | 121   | 25    | 2     | 47    | 1     | 9     | 215   |
| <i>Blasicrura kieneri</i>          | Mollusca, Gastropoda         | DQ324049 | 99  | 0     | 0     | 0     | 0     | 0     | 3     | 1     | 0     | 0     |
| <i>Conomurex luhuanus</i>          | Mollusca, Gastropoda         | JF693431 | 100 | 0     | 0     | 0     | 0     | 18    | 0     | 1     | 0     | 0     |
| <i>Crepidula onyx</i>              | Mollusca, Gastropoda         | AF546025 | 95  | 0     | 0     | 0     | 0     | 0     | 0     | 7     | 0     | 0     |
| <i>Lacuna pallidula</i>            | Mollusca, Gastropoda         | KT996151 | 86  | 0     | 0     | 0     | 1     | 0     | 0     | 19    | 10    | 0     |
| <i>Nassarius</i> sp.               | Mollusca, Gastropoda         | KY451382 | 90  | 0     | 0     | 0     | 0     | 0     | 5     | 0     | 0     | 0     |
| <i>Peasiella habei</i>             | Mollusca, Gastropoda         | HE590847 | 99  | 0     | 0     | 0     | 30    | 0     | 0     | 0     | 0     | 0     |
| <i>Philine babai</i>               | Mollusca, Gastropoda         | KF877703 | 85  | 0     | 0     | 0     | 39    | 0     | 0     | 0     | 0     | 0     |
| <i>Pterygia dactylus</i>           | Mollusca, Gastropoda         | KR087291 | 82  | 0     | 0     | 0     | 0     | 0     | 349   | 0     | 0     | 0     |
| <i>Pyrgulopsis micrococcus</i>     | Mollusca, Gastropoda         | AY367470 | 79  | 3204  | 0     | 0     | 0     | 0     | 0     | 0     | 0     | 0     |
| <i>Reishia bronni</i>              | Mollusca, Gastropoda         | HQ852758 | 99  | 0     | 0     | 0     | 18    | 0     | 1     | 2     | 0     | 0     |
| <i>Reishia clavigera</i>           | Mollusca, Gastropoda         | KP116909 | 100 | 0     | 0     | 0     | 229   | 44    | 9     | 12    | 13    | 0     |
| <i>Stenomelania crenulata</i>      | Mollusca, Gastropoda         | AB920321 | 83  | 0     | 0     | 0     | 0     | 0     | 0     | 3108  | 0     | 0     |
| <i>Tritonoharpa antiquata</i>      | Mollusca, Gastropoda         | FR717519 | 90  | 0     | 0     | 0     | 0     | 7     | 0     | 0     | 0     | 0     |
| <i>Baylisascaris schroederi</i>    | Nematoda, Ascaridida         | KJ587827 | 88  | 0     | 4359  | 0     | 0     | 0     | 0     | 0     | 0     | 0     |
| <i>Pseudobiceros bedfordi</i>      | Platyhelminthes, Polycladida | KY421515 | 74  | 0     | 0     | 38    | 0     | 0     | 2     | 0     | 0     | 0     |
| <i>Apatemon</i> sp.                | Platyhelminthes, Strigeidida | KT334182 | 84  | 0     | 164   | 0     | 0     | 0     | 0     | 0     | 0     | 0     |
| <i>Obama ladislavii</i>            | Platyhelminthes, Tricladida  | KC608258 | 78  | 0     | 0     | 0     | 202   | 0     | 9     | 0     | 0     | 0     |
| <i>Decapterus maruadsi</i>         | Vertebrata, Teleostei        | KY570761 | 100 | 0     | 0     | 0     | 67    | 18    | 0     | 0     | 0     | 0     |
| <i>Larimichthys crocea</i>         | Vertebrata, Teleostei        | LT972191 | 89  | 0     | 105   | 0     | 0     | 0     | 0     | 0     | 0     | 0     |
| <i>Omobranchus punctatus</i>       | Vertebrata, Teleostei        | KY315359 | 100 | 0     | 0     | 0     | 0     | 0     | 970   | 1     | 0     | 0     |
| <i>Prochilodus nigricans</i>       | Vertebrata, Teleostei        | FJ418758 | 86  | 0     | 0     | 0     | 0     | 0     | 0     | 21    | 0     | 0     |
| <i>Sphyræna pinguis</i>            | Vertebrata, Teleostei        | HM180889 | 99  | 0     | 0     | 0     | 0     | 0     | 57    | 0     | 0     | 0     |
| <i>Trebouxia aggregata</i>         | Chlorophyta, Microthamniales | EU123948 | 87  | 0     | 0     | 0     | 22    | 0     | 0     | 0     | 0     | 0     |
| <i>Tetracladium breve</i>          | Fungi, Ascomycota            | EU883410 | 86  | 0     | 0     | 0     | 34    | 0     | 0     | 0     | 0     | 0     |
| <i>Rhodotorula mucilaginoso</i>    | Fungi, Microbotryomycetes    | MF694646 | 100 | 0     | 479   | 0     | 0     | 0     | 0     | 0     | 0     | 0     |
| Unidentified sequences             |                              |          |     | 594   | 1834  | 251   | 252   | 112   | 2     | 11    | 5     | 648   |
| Total number of sequences          |                              |          |     | 42365 | 28175 | 46802 | 57634 | 61225 | 57196 | 46783 | 48798 | 51075 |

<sup>1</sup> The pufferfish juveniles were randomly selected from the specimens collected at Katase in July 2017, represented in Table 1. DNA sequences are included in supplementary file “NGS\_seq(2017).docx”. OTU IDs are represented in Table S4.

Table S4. Number of DNA sequence (OTU ID) from the intestinal contents of the pufferfish *Takifugu niphobles* juveniles collected at Katase in July 2017 <sup>1</sup>

| Organism                                 | OTU ID             | Number of sequences from pufferfish individual: |       |       |       |       |       |       |       |       |
|------------------------------------------|--------------------|-------------------------------------------------|-------|-------|-------|-------|-------|-------|-------|-------|
|                                          |                    | No. 1                                           | No. 2 | No. 3 | No. 4 | No. 5 | No. 6 | No. 7 | No. 8 | No. 9 |
| TTX-bearing organisms                    |                    |                                                 |       |       |       |       |       |       |       |       |
| <i>Planocera multitentaculata</i>        | OTU_27             | 0                                               | 0     | 0     | 936   | 0     | 272   | 833   | 0     | 0     |
| <i>Cephalothrix simula</i>               | OTU_155            | 0                                               | 0     | 0     | 0     | 0     | 2     | 0     | 0     | 0     |
| <i>Rapana venosa</i>                     | OTU_67             | 0                                               | 0     | 0     | 101   | 0     | 0     | 2     | 0     | 0     |
| Non-toxic organisms <sup>2</sup>         |                    |                                                 |       |       |       |       |       |       |       |       |
| <i>Eophila gestroi</i>                   | OTU_12             | 0                                               | 0     | 120   | 2051  | 767   | 3964  | 9672  | 0     | 0     |
| <i>Fitzingeria platyura</i>              | OTU_138            | 0                                               | 0     | 0     | 167   | 15    | 256   | 783   | 0     | 0     |
| Lumbricidae sp.                          | OTU_17             | 1                                               | 0     | 80    | 161   | 340   | 967   | 1581  | 2285  | 2773  |
| <i>Lumbricus rubellus</i>                | OTU_2              | 2964                                            | 0     | 3303  | 2951  | 5312  | 10777 | 15506 | 12539 | 5118  |
| <i>Metaphire sieboldi</i>                | OTU_68             | 0                                               | 0     | 0     | 0     | 0     | 115   | 0     | 0     | 0     |
| <i>Travoscolides chengammures</i>        | OTU_70             | 0                                               | 0     | 0     | 0     | 0     | 0     | 73    | 0     | 0     |
| <i>Tubificoides diazi</i>                | OTU_118            | 0                                               | 0     | 0     | 0     | 0     | 27    | 0     | 0     | 0     |
| <i>Enipo</i> sp.                         | OTU_41             | 0                                               | 0     | 0     | 0     | 0     | 0     | 256   | 0     | 0     |
| <i>Eumida alkyone</i>                    | OTU_139            | 0                                               | 0     | 0     | 0     | 0     | 15    | 0     | 0     | 0     |
| <i>Eumida longicornuta</i>               | OTU_35             | 0                                               | 0     | 0     | 0     | 34    | 0     | 25    | 0     | 538   |
| <i>Gastrolepidia clavigera</i>           | OTU_133            | 0                                               | 0     | 0     | 0     | 3     | 0     | 4     | 0     | 0     |
| <i>Harmothoe fuligineum</i>              | OTU_88             | 0                                               | 0     | 0     | 0     | 52    | 0     | 0     | 0     | 0     |
| <i>Lumbrineris</i> sp.                   | OTU_99             | 0                                               | 0     | 0     | 0     | 0     | 54    | 0     | 0     | 0     |
| <i>Malacoceros fuliginosus</i>           | OTU_51             | 0                                               | 0     | 0     | 0     | 0     | 0     | 152   | 20    | 0     |
| <i>Marenzelleria arctia</i>              | OTU_60             | 0                                               | 0     | 0     | 0     | 0     | 34    | 21    | 138   | 0     |
| <i>Mediomastus</i> sp.                   | OTU_101            | 0                                               | 0     | 0     | 0     | 20    | 146   | 2     | 2     | 0     |
| <i>Micropodarke dubia</i>                | OTU_116            | 0                                               | 0     | 0     | 71    | 0     | 0     | 0     | 0     | 0     |
| <i>Nephtys hombergii</i>                 | OTU_115            | 0                                               | 0     | 0     | 0     | 0     | 28    | 2     | 0     | 0     |
| <i>Notophyllum crypticum</i>             | OTU_117            | 0                                               | 0     | 0     | 0     | 30    | 0     | 0     | 0     | 0     |
| <i>Paraprionospio patiens</i>            | OTU_123            | 0                                               | 0     | 17    | 0     | 0     | 3     | 0     | 0     | 0     |
| <i>Polydora cornuta</i>                  | OTU_23, 46 and 141 | 0                                               | 0     | 877   | 314   | 101   | 148   | 1343  | 543   | 136   |
| <i>Polydora haswelli</i>                 | OTU_47, 72 and 150 | 0                                               | 0     | 0     | 0     | 0     | 0     | 201   | 105   | 0     |
| <i>Polydora hoplura</i>                  | OTU_44, 53 and 110 | 0                                               | 0     | 0     | 35    | 19    | 511   | 156   | 105   | 0     |
| <i>Polydora websteri</i>                 | OTU_31, 48 and 158 | 0                                               | 0     | 0     | 185   | 14    | 29    | 184   | 3     | 734   |
| <i>Sabellaria</i> sp.                    | OTU_22             | 0                                               | 2922  | 14    | 0     | 174   | 240   | 28    | 0     | 0     |
| <i>Scolelepis daphoinos</i>              | OTU_103            | 0                                               | 0     | 0     | 0     | 0     | 0     | 48    | 0     | 0     |
| <i>Spiochaetopterus</i> sp.              | OTU_39             | 0                                               | 0     | 0     | 0     | 0     | 784   | 0     | 0     | 0     |
| Eupodiidae sp.                           | OTU_104            | 0                                               | 0     | 33    | 0     | 0     | 0     | 0     | 0     | 0     |
| <i>Sericosura curva</i>                  | OTU_98             | 0                                               | 0     | 0     | 0     | 0     | 86    | 0     | 0     | 0     |
| <i>Amphibalanus amphitrite</i>           | OTU_75             | 0                                               | 0     | 3     | 1     | 1     | 0     | 14    | 6     | 192   |
| <i>Amphibalanus eburneus</i>             | OTU_79 and 157     | 0                                               | 0     | 110   | 0     | 10    | 50    | 30    | 0     | 97    |
| <i>Amphibalanus improvisus</i>           | OTU_21             | 507                                             | 0     | 180   | 5     | 2439  | 189   | 104   | 34    | 300   |
| Amphipoda sp.                            | OTU_95             | 0                                               | 0     | 0     | 0     | 0     | 0     | 0     | 40    | 0     |
| <i>Arcotheres sinensis</i>               | OTU_30             | 0                                               | 0     | 247   | 0     | 0     | 0     | 0     | 1130  | 0     |
| <i>Austrochiltonia</i> sp.               | OTU_129            | 0                                               | 0     | 0     | 0     | 0     | 0     | 0     | 11    | 0     |
| <i>Balanus trigonus</i>                  | OTU_18             | 2324                                            | 0     | 1932  | 15    | 0     | 655   | 343   | 373   | 7142  |
| <i>Caridea</i> sp.                       | OTU_81             | 0                                               | 0     | 88    | 0     | 0     | 0     | 0     | 0     | 0     |
| <i>Chthamalus</i> cf. <i>challengeri</i> | OTU_6              | 0                                               | 0     | 0     | 23926 | 21498 | 18083 | 1955  | 0     | 0     |

|                                        |                   |       |       |       |       |       |      |      |       |       |
|----------------------------------------|-------------------|-------|-------|-------|-------|-------|------|------|-------|-------|
| <i>Chthamalus proteus</i>              | OTU_69            | 0     | 0     | 135   | 0     | 0     | 0    | 0    | 0     | 0     |
| <i>Corophium multisetosum</i>          | OTU_56            | 0     | 0     | 0     | 0     | 0     | 182  | 0    | 0     | 0     |
| <i>Cryptopodia angulata</i>            | OTU_80            | 0     | 0     | 0     | 88    | 0     | 0    | 0    | 0     | 0     |
| <i>Evadne spinifera</i>                | OTU_140           | 0     | 0     | 0     | 0     | 0     | 4    | 5    | 0     | 0     |
| <i>Fistulobalanus albicostatus</i>     | OTU_5             | 0     | 0     | 369   | 23258 | 23294 | 4564 | 226  | 17    | 0     |
| <i>Gaetice depressus</i>               | OTU_100           | 0     | 0     | 0     | 0     | 0     | 49   | 0    | 0     | 0     |
| <i>Grandidierella japonica</i>         | OTU_29            | 0     | 0     | 0     | 0     | 0     | 0    | 227  | 453   | 0     |
| <i>Hemigrapsus sanguineus</i>          | OTU_109           | 0     | 0     | 0     | 0     | 0     | 22   | 0    | 0     | 0     |
| <i>Hemigrapsus takanoi</i>             | OTU_25            | 0     | 0     | 0     | 0     | 0     | 0    | 0    | 2004  | 0     |
| <i>Hyperacanthomysis longirostris</i>  | OTU_49            | 0     | 0     | 0     | 0     | 0     | 0    | 240  | 0     | 0     |
| Isopoda sp.                            | OTU_113           | 0     | 0     | 0     | 43    | 0     | 0    | 0    | 0     | 0     |
| <i>Leptodius nigromaculatus</i>        | OTU_11            | 0     | 0     | 677   | 0     | 0     | 196  | 1236 | 116   | 2544  |
| <i>Metapenaeopsis mogiensis</i>        | OTU_57            | 0     | 0     | 0     | 0     | 0     | 179  | 0    | 0     | 0     |
| <i>Monocorophium insidiosum</i>        | OTU_20, 38 and 96 | 0     | 0     | 3183  | 0     | 2     | 0    | 0    | 589   | 0     |
| <i>Pachygrapsus crassipes</i>          | OTU_4             | 0     | 0     | 607   | 47    | 17    | 1075 | 143  | 23265 | 0     |
| <i>Penilia avirostris</i>              | OTU_154           | 0     | 0     | 0     | 0     | 0     | 1    | 0    | 11    | 0     |
| <i>Penilia avirostris</i>              | OTU_3             | 2173  | 17521 | 675   | 229   | 4394  | 7148 | 2125 | 3047  | 2433  |
| <i>Pleopis polyphemoides</i>           | OTU_126           | 0     | 0     | 0     | 0     | 0     | 13   | 0    | 0     | 0     |
| <i>Plesionika quasigrandis</i>         | OTU_153           | 0     | 0     | 0     | 0     | 0     | 0    | 4    | 0     | 0     |
| <i>Pseudevadne tergestina</i>          | OTU_10            | 0     | 0     | 0     | 0     | 102   | 1537 | 5070 | 0     | 0     |
| <i>Sesarma reticulatum</i>             | OTU_1             | 12981 | 0     | 26417 | 197   | 94    | 1204 | 483  | 272   | 6470  |
| <i>Tetraclita japonica</i>             | OTU_114           | 0     | 0     | 0     | 0     | 21    | 0    | 0    | 0     | 0     |
| <i>Thalestris longimana</i>            | OTU_106           | 41    | 0     | 0     | 0     | 0     | 0    | 0    | 0     | 0     |
| <i>Trevathana dongshaensis</i>         | OTU_93            | 0     | 0     | 0     | 0     | 23    | 52   | 0    | 0     | 0     |
| <i>Acartia tsuensis</i>                | OTU_28            | 1718  | 0     | 48    | 0     | 0     | 0    | 4    | 198   | 230   |
| <i>Clausocalanus furcatus</i>          | OTU_86            | 0     | 0     | 0     | 0     | 0     | 45   | 0    | 0     | 0     |
| <i>Cyclops kikuchii</i>                | OTU_34            | 0     | 791   | 0     | 0     | 0     | 0    | 0    | 0     | 98    |
| <i>Labidocera japonica</i>             | OTU_149           | 0     | 0     | 0     | 0     | 0     | 17   | 0    | 0     | 0     |
| <i>Longipedia kikuchii</i>             | OTU_9, 24 and 85  | 1887  | 0     | 3678  | 0     | 0     | 0    | 0    | 58    | 12611 |
| <i>Mastigodiatomus albuquerquensis</i> | OTU_107           | 0     | 0     | 0     | 0     | 0     | 0    | 0    | 0     | 36    |
| <i>Mospicalanus</i> sp.                | OTU_84            | 0     | 0     | 63    | 0     | 0     | 0    | 0    | 0     | 0     |
| <i>Oithona dissimilis</i>              | OTU_78            | 241   | 0     | 0     | 0     | 0     | 0    | 0    | 0     | 0     |
| <i>Paracalanus aculeatus</i>           | OTU_143           | 0     | 0     | 0     | 0     | 3     | 5    | 0    | 0     | 0     |
| <i>Paracalanus parvus</i>              | OTU_33            | 0     | 0     | 307   | 46    | 0     | 623  | 112  | 0     | 235   |
| <i>Paracalanus tropicus</i>            | OTU_132           | 0     | 0     | 0     | 0     | 0     | 0    | 6    | 0     | 0     |
| <i>Paracyclops nana</i>                | OTU_62            | 0     | 0     | 0     | 0     | 0     | 0    | 0    | 0     | 136   |
| <i>Pseudodiatomus inopinus</i>         | OTU_13            | 4734  | 0     | 295   | 0     | 0     | 0    | 0    | 14    | 4817  |
| <i>Pseudodiatomus ishigakiensis</i>    | OTU_61            | 0     | 0     | 215   | 4     | 0     | 20   | 12   | 17    | 808   |
| <i>Pseudodiatomus koreanus</i>         | OTU_7 and 147     | 6926  | 0     | 1139  | 0     | 0     | 0    | 0    | 991   | 2067  |
| <i>Pseudodiatomus marinus</i>          | OTU_77            | 0     | 0     | 83    | 0     | 0     | 0    | 0    | 167   | 0     |
| <i>Bradyia hilariformis</i>            | OTU_32            | 0     | 0     | 649   | 0     | 0     | 0    | 0    | 0     | 0     |
| <i>Chaetocladus perennis</i>           | OTU_119           | 0     | 0     | 0     | 0     | 0     | 0    | 16   | 0     | 0     |
| <i>Chazara briseis</i>                 | OTU_64            | 0     | 0     | 0     | 54    | 46    | 0    | 105  | 0     | 0     |
| <i>Corynoneura</i> sp.                 | OTU_55            | 0     | 0     | 0     | 0     | 0     | 0    | 131  | 0     | 0     |
| Diptera sp.                            | OTU_90            | 0     | 0     | 0     | 0     | 65    | 0    | 0    | 0     | 0     |
| <i>Heliconius sara</i>                 | OTU_135           | 0     | 0     | 0     | 0     | 0     | 0    | 11   | 0     | 0     |

|                                    |                                                                |       |       |       |       |       |       |       |       |       |
|------------------------------------|----------------------------------------------------------------|-------|-------|-------|-------|-------|-------|-------|-------|-------|
| <i>Leuctra grandis</i>             | OTU_54                                                         | 0     | 0     | 0     | 0     | 0     | 0     | 0     | 0     | 482   |
| <i>Lysimelia neleusalis</i>        | OTU_89                                                         | 0     | 0     | 0     | 0     | 0     | 0     | 0     | 0     | 55    |
| Orthocladiinae sp.                 | OTU_45                                                         | 0     | 0     | 0     | 304   | 0     | 0     | 0     | 0     | 0     |
| Orthocladiinae sp.                 | OTU_65                                                         | 160   | 0     | 138   | 0     | 0     | 0     | 0     | 1     | 107   |
| <i>Pintomyia fischeri</i>          | OTU_26                                                         | 1910  | 0     | 0     | 0     | 0     | 0     | 0     | 0     | 0     |
| <i>Polypedilum cultellatum</i>     | OTU_120                                                        | 0     | 0     | 0     | 0     | 20    | 0     | 0     | 0     | 0     |
| <i>Probergrothius sexpunctatus</i> | OTU_58                                                         | 0     | 0     | 0     | 0     | 0     | 0     | 0     | 153   | 0     |
| <i>Pseudonapomyza lacteipennis</i> | OTU_125                                                        | 0     | 0     | 0     | 15    | 1     | 0     | 0     | 0     | 0     |
| <i>Smittia nudipennis</i>          | OTU_94                                                         | 0     | 0     | 48    | 0     | 0     | 0     | 0     | 0     | 0     |
| <i>Spialia orbifer</i>             | OTU_131                                                        | 0     | 0     | 0     | 0     | 0     | 0     | 0     | 24    | 0     |
| <i>Brachidontes pharaonis</i>      | OTU_92                                                         | 0     | 0     | 164   | 0     | 0     | 0     | 0     | 0     | 0     |
| <i>Crassostrea gigas</i>           | OTU_15                                                         | 0     | 0     | 409   | 1445  | 1903  | 1199  | 125   | 30    | 0     |
| <i>Dendostrea crenulifera</i>      | OTU_50                                                         | 0     | 0     | 0     | 66    | 204   | 33    | 0     | 0     | 0     |
| <i>Ostrea circumpecta</i>          | OTU_87                                                         | 0     | 0     | 0     | 0     | 6     | 0     | 0     | 0     | 53    |
| <i>Ostrea stentina</i>             | OTU_74                                                         | 0     | 0     | 89    | 0     | 0     | 33    | 0     | 0     | 0     |
| <i>Pseudopythina subsinuata</i>    | OTU_71                                                         | 0     | 0     | 0     | 0     | 0     | 106   | 0     | 0     | 0     |
| <i>Xenostrobus atratus</i>         | OTU_59                                                         | 0     | 0     | 121   | 25    | 2     | 47    | 1     | 9     | 215   |
| <i>Blasicrura kieneri</i>          | OTU_152                                                        | 0     | 0     | 0     | 0     | 0     | 3     | 1     | 0     | 0     |
| <i>Conomurex luhuanus</i>          | OTU_122                                                        | 0     | 0     | 0     | 0     | 18    | 0     | 1     | 0     | 0     |
| <i>Crepidula onyx</i>              | OTU_127                                                        | 0     | 0     | 0     | 0     | 0     | 0     | 7     | 0     | 0     |
| <i>Lacuna pallidula</i>            | OTU_112                                                        | 0     | 0     | 0     | 1     | 0     | 0     | 19    | 10    | 0     |
| <i>Nassarius</i> sp.               | OTU_159                                                        | 0     | 0     | 0     | 0     | 0     | 5     | 0     | 0     | 0     |
| <i>Peasiella habei</i>             | OTU_111                                                        | 0     | 0     | 0     | 30    | 0     | 0     | 0     | 0     | 0     |
| <i>Philine babai</i>               | OTU_108                                                        | 0     | 0     | 0     | 39    | 0     | 0     | 0     | 0     | 0     |
| <i>Pterygia dactylus</i>           | OTU_40                                                         | 0     | 0     | 0     | 0     | 0     | 349   | 0     | 0     | 0     |
| <i>Pyrgulopsis micrococcus</i>     | OTU_19                                                         | 3204  | 0     | 0     | 0     | 0     | 0     | 0     | 0     | 0     |
| <i>Reishia bronni</i>              | OTU_148                                                        | 0     | 0     | 0     | 18    | 0     | 1     | 2     | 0     | 0     |
| <i>Reishia clavigera</i>           | OTU_76                                                         | 0     | 0     | 0     | 229   | 44    | 9     | 12    | 13    | 0     |
| <i>Stenomelania crenulata</i>      | OTU_14                                                         | 0     | 0     | 0     | 0     | 0     | 0     | 3108  | 0     | 0     |
| <i>Tritonoharpa antiquata</i>      | OTU_142                                                        | 0     | 0     | 0     | 0     | 7     | 0     | 0     | 0     | 0     |
| <i>Baylisascaris schroederi</i>    | OTU_16                                                         | 0     | 4359  | 0     | 0     | 0     | 0     | 0     | 0     | 0     |
| <i>Pseudobiceros bedfordi</i>      | OTU_105                                                        | 0     | 0     | 38    | 0     | 0     | 2     | 0     | 0     | 0     |
| <i>Apatemon</i> sp.                | OTU_63                                                         | 0     | 164   | 0     | 0     | 0     | 0     | 0     | 0     | 0     |
| <i>Obama ladislavii</i>            | OTU_52                                                         | 0     | 0     | 0     | 202   | 0     | 9     | 0     | 0     | 0     |
| <i>Decapterus maruadsi</i>         | OTU_82                                                         | 0     | 0     | 0     | 67    | 18    | 0     | 0     | 0     | 0     |
| <i>Larimichthys crocea</i>         | OTU_97                                                         | 0     | 105   | 0     | 0     | 0     | 0     | 0     | 0     | 0     |
| <i>Omobranchus punctatus</i>       | OTU_36                                                         | 0     | 0     | 0     | 0     | 0     | 970   | 1     | 0     | 0     |
| <i>Prochilodus nigricans</i>       | OTU_121                                                        | 0     | 0     | 0     | 0     | 0     | 0     | 21    | 0     | 0     |
| <i>Sphyræna pinguis</i>            | OTU_91                                                         | 0     | 0     | 0     | 0     | 0     | 57    | 0     | 0     | 0     |
| <i>Trebouxia aggregata</i>         | OTU_134                                                        | 0     | 0     | 0     | 22    | 0     | 0     | 0     | 0     | 0     |
| <i>Tetracladium breve</i>          | OTU_102                                                        | 0     | 0     | 0     | 34    | 0     | 0     | 0     | 0     | 0     |
| <i>Rhodotorula mucilaginoso</i>    | OTU_37                                                         | 0     | 479   | 0     | 0     | 0     | 0     | 0     | 0     | 0     |
| Unidentified sequences             | OTU_ 42, 43, 66, 83, 124, 130, 145, 146, 151, 156, 160 and 161 | 594   | 1834  | 251   | 252   | 112   | 2     | 11    | 5     | 648   |
| Total number of sequences          |                                                                | 42365 | 28175 | 46802 | 57634 | 61225 | 57196 | 46783 | 48798 | 51075 |

<sup>1</sup> The pufferfish juveniles were randomly selected from the specimens collected at Katase in July 2017, represented in Table 1.

<sup>2</sup> Organisms named as presented in Table S3.

Table S5. Toxicity and TTX amount in the flatworm *Planocera multitentaculata* used in this study

| Date | Stage <sup>1</sup> | Weight (g) <sup>2</sup> | No. of ind. or clutch <sup>3</sup> | Toxicity (µg/g) | TTX amount (µg/ind. or clutch) |                |
|------|--------------------|-------------------------|------------------------------------|-----------------|--------------------------------|----------------|
| 2015 | May-June           | Egg                     | 0.29 ± 0.10                        | 15              | 1867 ± 1589                    | 384 ± 169      |
|      | June-July          | Larva                   | -                                  | 5700            | -                              | 0.069 ± 0.021  |
| 2016 | April              | Adult                   | 3.49 ± 0.51                        | 9               | 91.9 ± 0.9                     | 334.0 ± 201.9  |
|      | May                | Adult                   | 3.47 ± 0.49                        | 9               | 610.8 ± 2.1                    | 2091.4 ± 469.3 |
|      |                    | Egg                     | 0.04 ± 0.02                        | 19              | 2673 ± 1214                    | 106 ± 40       |
|      |                    | Larva                   | -                                  | 8500            | -                              | 0.120 ± 0.046  |

<sup>1</sup> Larvae hatched from the wild eggs were collected in the laboratory aquaria.

<sup>2</sup> Weight of adult represents body weight.

<sup>3</sup> Data of larva/adult and eggs were obtained from individuals and a clutch, respectively.

Table S6. Toxication of the young pufferfish after feeding on adult flatworms

| Pufferfish                    | Experiment | No. of individuals | Total length (mm) | Body weight (g) | TTX amount of the flatworm ( $\mu\text{g}$ ) <sup>1</sup> | TTX amount of the pufferfish ( $\mu\text{g}/\text{ind.}$ ) <sup>2</sup> | Ingestion rate (%) |
|-------------------------------|------------|--------------------|-------------------|-----------------|-----------------------------------------------------------|-------------------------------------------------------------------------|--------------------|
| Flatworm-fed individual       | Trial I    | 9                  | 85 ± 5            | 10.6 ± 2.2      | 152 ± 97                                                  | 212 ± 227                                                               | 129 ± 60*          |
|                               | Trial II   | 9                  | 84 ± 6            | 10.7 ± 2.3      | 1,005 ± 305*                                              | 181 ± 200                                                               | 19 ± 21            |
| Non-toxic feed-fed individual | Control    | 6                  | 89 ± 5            | 13.0 ± 1.6      | N/A <sup>3</sup>                                          | N/D <sup>4</sup>                                                        | N/A                |

<sup>1</sup> TTX amount in the toxic tissue of the flatworm was estimated based on the toxin content of half an individual.

<sup>2</sup> TTX amount of the pufferfish is the sum of skin, liver, gonad, intestine and others.

<sup>3</sup> N/A: not applicable.

<sup>4</sup> N/D: not detected.

\* Significant difference was observed between trial I and II ( $P < 0.05$ ).

Table S7. Tissue localization (%) of TTX in the pufferfish after feeding on toxic flatworm

| Tissue    | Trial I (n=9) | Trial II (n=9) |
|-----------|---------------|----------------|
| Skin      | 14.0 ± 11.2   | 22.1 ± 15.3    |
| Liver     | 62.0 ± 16.4   | 59.2 ± 12.7    |
| Gonad     | 0.9 ± 1.0     | 0.9 ± 0.9      |
| Intestine | 14.7 ± 7.9    | 16.3 ± 13.9    |
| Others    | 8.4 ± 7.5     | 1.4 ± 2.2      |
